# Supplementary material
Source: PubMed Central journal article supplement (PMC6500142)
Supplement: pnas.1821510116.sapp.pdf [file pnas.1821510116.sapp.pdf]

Inherited Predisposition to Malignant Mesothelioma and Overall Survival Following  
Platinum Chemotherapy: Supplementary Material

Methods

- Figure S1. Survival of patients with mesothelioma treated with platinum chemotherapy, by patient's *BAP1* genotype and primary site of tumor
- Table S1. Personal and family history of cancers for mesothelioma patients with germline mutations in targeted genes
- Table S2. *BAP1* mutations in tumors
- Table S3. Familial mesothelioma among patients with no inherited mutation in any targeted gene
- Table S4. Numbers of unrelated cases and controls with inherited loss-of-function mutations in genes associated with malignant mesothelioma
- Table S5. Germline mutations and survival following platinum-based chemotherapy
- Table S6. Survival following platinum chemotherapy of patients with germline mutations
- Table S7. Independent effects of age at diagnosis, gender, and genotype on death within 3 years of diagnosis for patients with pleural mesothelioma treated with platinum-based chemotherapy
- Table S8. Genes sequenced using BROCA v10

## METHODS

**Genomics.** Human subjects committees of the National Cancer Institute (NCI), the University of Chicago (UC), and the University of Washington (UW) approved the studies; all patients provided written informed consent. For patients from the NCI, genomic DNA isolated from peripheral blood was sequenced using the multi-gene panel BROCA v10, which includes 73 genes involved in DNA repair and/or in inherited predisposition to solid tumors (Table S8)<sup>1</sup>. BROCA detects all classes of mutations: point mutations, small insertions and deletions, and large genomic duplications or deletions. Sequencing, bioinformatics, and variant interpretation were carried out as previously described<sup>2</sup>. For patients from UC, genetic testing was carried out as previously described<sup>3</sup>. For all patients, analyses of germline mutations included only unambiguously damaging mutations: frameshifts, nonsense mutations, complete gene deletions, internal genomic deletions leading to truncations, splice mutations shown experimentally to lead to loss of functional transcripts, and missense mutations shown experimentally to damage protein function. That is, patients with variants of unknown significance (VUS), but with no clearly damaging mutation in any gene, were defined as having no detectable germline mutation. No patients carried missense mutations of uncertain significance in *BAP1*. Frequencies of germline mutations in the mesothelioma patients were compared to frequencies in two series of controls: 27173 individuals of European ancestry in the Exome Aggregation Consortium (ExAC) database, after removing exomes contributed by The Cancer Genome Atlas (TCGA), and 7325 participants of European ancestry in the Women's Health Initiative (WHI) who were older than age 70y and never developed cancer<sup>4,5,6</sup>. For patients with inherited *BAP1* mutations, whole exome sequencing was carried out on DNA extracted from formalin fixed paraffin embedded (FFPE) tumor tissue, as previously described<sup>7</sup>.

**Statistics.** Survival was evaluated by Kaplan-Meier methods with survival curves compared by 2-tailed log-rank tests, with exact tests if there were <10 events in any group. Survival data was censored as of June 30, 2017 for NCI patients and as of September 30, 2018 for UC patients. Associations between allele frequencies and clinical and demographic characteristics were compared by two-tailed chi-square tests or Fisher's exact tests, as appropriate. Allele frequencies were compared gene by gene, adjusted for differences in ancestry between case and control series. Effect of genotype on survival after adjusting for age at diagnosis and gender was assessed by multiple logistic regression analysis, comparing patients who either died by 2, 3, or 5 years or who survived longer than these time points.

## REFERENCES

---

1. Walsh T, et al. (2010) Detection of inherited mutations for breast and ovarian cancer using genomic capture and massively parallel sequencing. *Proc Natl Acad Sci USA* 107(28):12629-12633.
2. Pritchard CC, et al. (2016) Inherited DNA-repair gene mutations in men with metastatic prostate cancer *N Engl J Med* 375(5):443-453
3. Panou V, et al. (2018) Frequency of germline mutations in cancer susceptibility genes in malignant mesothelioma. *J Clin Oncol* 36(28):2863-2871
4. Isakoff SJ, et al. (2015) TBCRC009: A multicenter phase II clinical trial of platinum monotherapy with biomarker assessment in metastatic triple-negative breast cancer. *J Clin Oncol* 33(17):1902-1909.
5. Bhattacharyya A, Ear US, Koller BH, Weichselbaum RR, Bishop DK (2000) The breast cancer susceptibility gene *BRCA1* is required for subnuclear assembly of Rad51 and survival following treatment with the DNA cross-linking agent cisplatin. *J Biol Chem* 275:23899-23903
6. FLOSSIES: A database of germline genomic variation in healthy older women: <https://whi.color.com/>
7. Chang W, et al. (2016) Multi-dimensional clinomics for precision therapy of children and adolescent young adults with relapsed and refractory cancer: a report from the center for cancer research. *Clin Cancer Res* 22(15):3810-3820.

**A**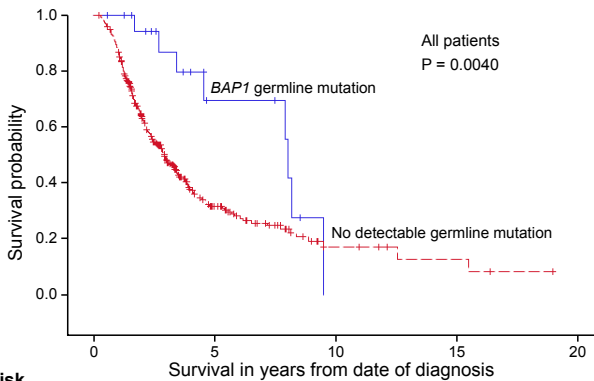**No. at Risk**

|                                 |     |    |   |   |
|---------------------------------|-----|----|---|---|
| <i>BAP1</i> germline mutation   | 21  | 6  | 0 |   |
| No detectable germline mutation | 345 | 51 | 7 | 3 |

**B**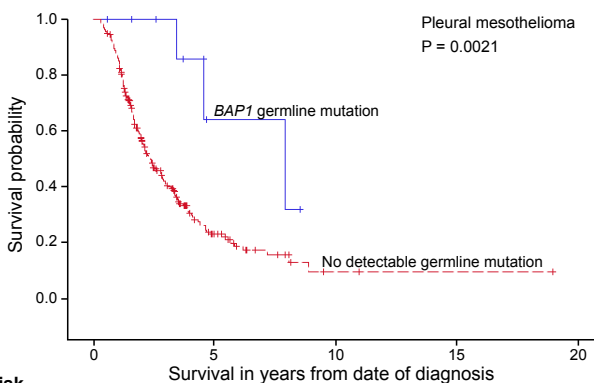**No. at Risk**

|                                 |     |    |   |   |
|---------------------------------|-----|----|---|---|
| <i>BAP1</i> germline mutation   | 10  | 2  | 0 |   |
| No detectable germline mutation | 241 | 26 | 2 | 1 |

**C**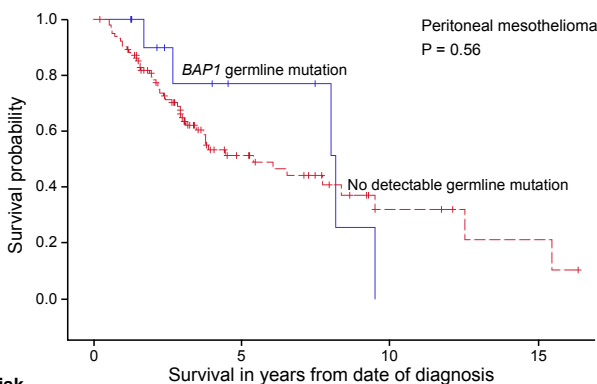**No. at Risk**

|                                 |     |    |   |   |
|---------------------------------|-----|----|---|---|
| <i>BAP1</i> germline mutation   | 12  | 4  | 0 |   |
| No detectable germline mutation | 102 | 24 | 5 | 2 |

**Figure S1. Survival of patients with mesothelioma treated with platinum chemotherapy, by patient's *BAP1* genotype and primary site of tumor.** Survival of patients with an inherited damaging mutation in *BAP1* is indicated in blue; survival of patients with no inherited mutation in any targeted gene is indicated in red. **(A)** All mesothelioma patients with versus without inherited mutation. Median survival: 8.0 vs 2.9 years,  $P=0.004$ . **(B)** Pleural mesothelioma patients with versus without inherited mutation. Median survival: 7.9 vs 2.4 years,  $P=0.002$ . **(C)** Peritoneal mesothelioma patients with versus without inherited mutation. Median survival: 8.2 vs 5.4 years,  $P=0.56$ .

**Table S1. Personal and family history of cancers for mesothelioma patients with germline mutations in targeted genes**

| ID      | Sex | Age dx | Asbestos | Site       | Gene          | Mutation                 | Protein        | Personal history other cancers                                    | Family history mesothelioma | Family history other cancers                   |
|---------|-----|--------|----------|------------|---------------|--------------------------|----------------|-------------------------------------------------------------------|-----------------------------|------------------------------------------------|
| MNH254  | M   | 48     | No       | Peritoneum | <i>BAP1</i>   | c.122+1G>A (exon3)       |                | Ocular melanoma, cutaneous melanoma, basal cell, lung, meningioma | -                           | Gastric, lung                                  |
| MNH207  | M   | 69     | Yes      | Peritoneum | <i>BAP1</i>   | c.155G>A (exon4)         | W52X           | Prostate                                                          | -                           | Breast, melanoma                               |
| MNH182  | F   | 59     | Yes      | Pleura     | <i>BAP1</i>   | c.436insA (exon6)        | R146fs         | Breast                                                            | -                           | Breast, ovary, lung, pancreas, testis          |
| MNH104  | M   | 56     | Unknown  | Peritoneum | <i>BAP1</i>   | c.437+1G>C (exon6)       |                | Bladder, skin                                                     | -                           | None                                           |
| MNH007* | F   | 50     | No       | Pleura     | <i>BAP1</i>   | c.659+1G>C (exon8)       |                | -                                                                 | Father, 2 sisters           | Breast, basal cell, kidney, ocular melanoma    |
| MNH029* | F   | 50     | Unknown  | Pleura     | <i>BAP1</i>   | c.659+1G>C (exon8)       |                | -                                                                 | Father, 2 sisters           | Breast, basal cell, kidney, ocular melanoma    |
| MNH248  | F   | 50     | No       | Pleura     | <i>BAP1</i>   | c.659+1G>T (exon8)       |                | -                                                                 | -                           | Melanoma                                       |
| MNH107  | F   | 46     | Yes      | Pleura     | <i>BAP1</i>   | c.836C>A (exon10)        | S279X          | -                                                                 | -                           | Prostate                                       |
| MNH018  | M   | 44     | Unknown  | Peritoneum | <i>BAP1</i>   | c.1717delC (exon13)      | L573fs         | -                                                                 | -                           | Gastric                                        |
| MNH088* | F   | 55     | Unknown  | Pleura     | <i>BAP1</i>   | c.1717delC (exon13)      | L573fs         | Bladder, melanoma, breast                                         | Mother, maternal cousin     | Melanoma, ocular melanoma, skin                |
| MNH177  | M   | 56     | Yes      | Peritoneum | <i>BAP1</i>   | c.1717delC (exon13)      | L573fs         | -                                                                 | -                           | Breast, thyroid                                |
| MNH227* | M   | 51     | Unknown  | Peritoneum | <i>BAP1</i>   | c.1717delC (exon13)      | L573fs         | Bladder                                                           | Paternal aunt and cousin    | Hodgkin lymphoma, ocular melanoma, nasopharynx |
| MNH240  | F   | 60     | Yes      | Pleura     | <i>BAP1</i>   | c.178C>T (exon4)         | R60X           | Cutaneous melanoma                                                | -                           | Breast, colon, kidney, melanoma                |
| MNH116  | F   | 53     | Yes      | Pleura     | <i>BAP1</i>   | c.1882delTCAC (exon14)   | S628fs         | Basal cell                                                        | Father                      | Ocular melanoma, skin                          |
| MNH159  | F   | 59     | Unknown  | Pleura     | <i>BAP1</i>   | c.1938T>A (exon15)       | Y646X          | -                                                                 | Father, brother, sister     | Ocular melanoma                                |
| MNH074  | M   | 48     | Yes      | Peritoneum | <i>BAP1</i>   | c.1956delGG (exon15)     | E652fs         | Thyroid                                                           | Mother, brother             | -                                              |
| MNH199  | M   | 55     | Yes      | Peritoneum | <i>BAP1</i>   | c.2050C>T (exon16)       | Q684X          | -                                                                 | -                           | Breast, brain, lung                            |
| MNH195  | F   | 47     | Yes      | Peritoneum | <i>BAP1</i>   | c.2188T>A (exon17)       | X730R          | Squamous cell                                                     | -                           | Colon                                          |
| MNH086  | M   | 83     | Yes      | TV         | <i>BRCA2</i>  | c.5946delT (exon11)      | S1982fs        | Basal cell, colon                                                 | -                           | Breast, lung                                   |
| MNH216  | F   | 63     | Unknown  | Peritoneum | <i>CHEK2</i>  | c.538C>T (exon4)         | R180X          | -                                                                 | -                           | Lung, melanoma, lymphoma                       |
| MNH011  | F   | 50     | Yes      | Peritoneum | <i>CHEK2</i>  | c.1036C>T                | R346C          | -                                                                 | -                           | Lymphoma, bladder, breast                      |
| MNH065  | M   | 67     | Yes      | Pleura     | <i>CHEK2</i>  | c.1229delC (exon12)      | T410fs         | Basal cell                                                        | -                           | Breast, colon                                  |
| MNH020  | M   | 66     | Yes      | Pleura     | <i>CHEK2</i>  | del exons 9-10 (5395 bp) |                | -                                                                 | -                           | Melanoma                                       |
| MNH052  | M   | 79     | Yes      | Pleura     | <i>CHEK2</i>  | del exons 9-10 (5395 bp) |                | Prostate                                                          | -                           | Pancreas                                       |
| MNH145  | M   | 59     | Yes      | Peritoneum | <i>MLH1</i>   | del exon 16 - 3'UTR      | del aa 548-756 | -                                                                 | -                           | Colon, ovary, gastric, breast, melanoma, liver |
| MNH242  | F   | 60     | No       | Pleura     | <i>MRE11A</i> | c.504del8 (exon6)        | L168fs         | Melanoma                                                          | -                           | Breast, colon, lung, skin                      |
| MNH021  | F   | 60     | Yes      | Peritoneum | <i>PALB2</i>  | c.2092delC (exon5)       | L698fs         | -                                                                 | -                           | Bladder, breast, gastric, pancreas, prostate   |
| MNH092  | F   | 23     | Unknown  | Peritoneum | <i>PALB2</i>  | c.3048delT (exon10)      | F1016fs        | -                                                                 | -                           | -                                              |
| MNH153  | M   | 54     | Yes      | Peritoneum | <i>POT1</i>   | c.669C>G (exon9)         | Y223X          | Thyroid                                                           | -                           | Site unknown                                   |
| MNH041  | F   | 27     | No       | Pleura     | <i>TP53</i>   | c.742C>T (exon7)         | R248W          | -                                                                 | -                           | None: <i>de novo</i> mutation                  |

\*MNH007 and MNH029 are sisters; MNH088 and MNH227 are cousins

**Table S2. BAP1 mutations in tumors**

| Patient ID | tumor content | mean coverage targeted sites | % of positions $\geq 20x$ | BAP1 germline mutation |              |         |                          | BAP1 point mutations in tumors |                |         |                 | BAP1 somatic gains and losses in tumors |           |                   |
|------------|---------------|------------------------------|---------------------------|------------------------|--------------|---------|--------------------------|--------------------------------|----------------|---------|-----------------|-----------------------------------------|-----------|-------------------|
|            |               |                              |                           | Position (hg19)        | cDNA         | Protein | total var reads in tumor | Position (hg19)                | cDNA           | Protein | total var reads | Position (hg19)                         | Type      | median log2 ratio |
| MNH007     | 0.30          | 166                          | 95.7                      | chr3:52440844          | c.659(+1)G>C |         | 133 71                   | chr3:52439196                  | c.1046delA     | N349fs  | 131 35          |                                         |           |                   |
| MNH018     | 0.80          | 142                          | 95.6                      | chr3:52437444          | c.1717delC   | L573fs  | 213 190                  |                                |                |         |                 | unbalanced duplication                  |           |                   |
| MNH074     | 1.00          | 144                          | 95.3                      | chr3:52436821          | c.1956delGG  | E652fs  | 105 22                   |                                |                |         |                 | chr3:52,388,360-52,437,492              | loss      | -0.31             |
| MNH088     | 0.72          | 59                           | 81.3                      | chr3:52437444          | c.1717delC   | L573fs  | 77 49                    | chr3:52441217                  | c.553G>A       | G185R   | 21 7            | chr3:50,138,355-57,472,326              | imbalance | 0.08              |
| MNH104     | 0.29          | 68                           | 74.8                      | chr3:52441414          | c.437(+1)G>C |         | 177 49                   | chr3:52439877                  | c.834_835delTG | E278fs  | 67 22           | chr3:51,895,441-52,934,690              | gain      | 0.41              |
| MNH107     | 0.71          | 63                           | 92.3                      | chr3:52439876          | c.836C>A     | S279X   | 130 57                   | chr3:52442491                  | c.254A>T       | Q85L    | 128 7           |                                         |           |                   |
| MNH177     | 0.60          | 111                          | 94.3                      | chr3:52437444          | c.1717delC   | L573fs  | 114 91                   |                                |                |         |                 | chr3:52,326,997-52,440,657              | loss      | -0.52             |
| MNH182     | 0.70          | 151                          | 95.4                      | chr3:52441415          | c.436dupA    | R146fs  | 195 100                  | chr3:52443866                  | c.20_29del     | E7fs    | 82 18           | chr3:52,387,483-52,439,619              | loss      | -0.35             |
| MNH207     | 0.55          | 140                          | 95.4                      | chr3:52442590          | c.155G>A     | W52X    | 321 240                  |                                |                |         |                 | chr3:52,386,421-52,440,160              | loss      | -0.46             |
|            |               |                              |                           |                        |              |         |                          |                                |                |         |                 | chr3:52,440,160-52,445,415              | gain      | 0.35              |
| MNH227     | 0.85          | 117                          | 94.1                      | chr3:52437444          | c.1717delC   | L573fs  | 157 71                   | chr3:52437549                  | c.1612delC     | L538fs  | 168 23          | chr3:52,440,657-52,445,415              | gain      | 0.58              |
| MNH240     | 0.25          | 104                          | 93.9                      | chr3:52442567          | c.178C>T     | R60X    | 212 103                  | chr3:52442492                  | c.253C>T       | Q85X    | 145 41          | chr3:52,326,997-52,440,657              | loss      | -0.66             |
| MNH254     | 0.95          | 130                          | 96.1                      | chr3:52443569          | c.122(+1)G>A |         | 145 88                   |                                |                |         |                 | chr3:52,393,077-52,440,160              | loss      | -0.32             |

**Table S3. Familial mesothelioma among patients with no detected inherited mutations**

| Patient | Site of disease | Histology    | Age dx (years) | Sex | Asbestos exposure of proband                           | Ever smoked | Relative with mesothelioma | Asbestos exposure of relative                                                                                           |
|---------|-----------------|--------------|----------------|-----|--------------------------------------------------------|-------------|----------------------------|-------------------------------------------------------------------------------------------------------------------------|
| MNH056  | Pleural         | Epitheloid   | 51             | F   | None known                                             | No          | Uncle                      | Pipe insulator >30 years                                                                                                |
| MNH059  | Pleural         | Epitheloid   | 53             | M   | Self-employed plumbing and heating, 15 years' exposure | Yes         | Uncle                      | Worked entire adult life in garage                                                                                      |
| MNH125  | Pleural         | Sarcoma-toid | 61             | M   | Retired asbestos insulator, 36 years' exposure         | No          | Father                     | Worked entire adult life as asbestos insulator, same company as son                                                     |
| MNH139  | Pleural         | Epitheloid   | 71             | M   | Career Navy, 8 years' exposure                         | Yes         | Uncle                      | Not sure if uncle's cancer was mesothelioma or lung, no information on exposure                                         |
| MNH144  | Peritoneal      | Epitheloid   | 12             | M   | None known                                             | Yes         | Grandfather                | Long term exposure at power plant documented by asbestos screening program, 20y history of pleural plaques, still alive |
| MNH245  | Pleural         | Epitheloid   | 42             | F   | None known                                             | No          | Mother                     | Died of pleural mesothelioma, no information on exposure                                                                |



**Table S4. Numbers of unrelated cases and controls with inherited loss-of-function mutations in genes associated with malignant mesothelioma**

|               | Cases |     |       | %   | Controls* |       | OR (95% CI)        | P        |
|---------------|-------|-----|-------|-----|-----------|-------|--------------------|----------|
|               | NCI   | UC  | Total |     | Source    | N     |                    |          |
| Total**       | 239   | 198 | 432   |     | ExAC      | 27173 |                    |          |
|               |       |     |       |     | WHI       | 7325  |                    |          |
| <i>BAP1</i>   | 16    | 6   | 22    | 5.1 | ExAC      | 1     | 1458 (196, 10843)  | < 10E-30 |
|               |       |     |       |     | WHI       | 1     | 393 (53, 2923)     | < 10E-30 |
| <i>BRCA2</i>  | 1     | 3   | 4     | 0.9 | ExAC      | 90    | 2.80 (1.02, 7.66)  | 0.036    |
|               |       |     |       |     | WHI       | 12    | 5.67 (1.82, 17.65) | 0.0007   |
| <i>CHEK2</i>  | 5     | 3   | 8     | 1.9 | ExAC      | 154   | 3.29 (1.61, 6.75)  | 0.00004  |
|               |       |     |       |     | WHI       | 32    | 4.28 (1.96, 9.34)  | 0.0006   |
| <i>MLH1</i>   | 1     | 0   | 1     | 0.2 | ExAC      | 3     | 20.9 (2.16, 201.0) | 0.00008  |
|               |       |     |       |     | WHI       | -     |                    |          |
| <i>MRE11A</i> | 1     | 1   | 2     | 0.5 | ExAC      | 18    | 6.98 (1.62, 30.19) | 0.002    |
|               |       |     |       |     | WHI       | 5     | 6.78 (1.31, 35.04) | 0.008    |
| <i>PALB2</i>  | 2     | 0   | 2     | 0.5 | ExAC      | 24    | 5.24 (1.24, 22.23) | 0.012    |
|               |       |     |       |     | WHI       | 7     | 4.84 (1.00, 23.37) | 0.030    |
| <i>POT1</i>   | 1     | 0   | 1     | 0.2 | ExAC      | 7     | 8.94 (1.11, 72.84) | 0.013    |
|               |       |     |       |     | WHI       | -     |                    |          |

\*Control series: Exome Aggregation Consortium (ExAC) with exomes from TCGA removed, N = 27,173; Women Health Initiative (WHI) participants, age >70y and cancer free, N = 7,325. All patients with damaging mutations were of European ancestry, so only European ancestry controls were included in analyses.

\*\*Total excludes duplicate records for 5 patients seen at both NCI and UC, and excludes second relatives from each of two families

**Table S5. Germline mutations and survival following platinum-based chemotherapy**

|                                      | All patients      | Pleural disease   | Peritoneal disease |
|--------------------------------------|-------------------|-------------------|--------------------|
| Number of patients                   |                   |                   |                    |
| Germline mutation in <i>BAP1</i> *   | 21                | 10                | 12                 |
| Germline mutation, any gene*         | 40                | 20                | 21                 |
| No detectable germline mutation      | 345               | 241               | 102                |
| Median years survival [95%CI]        |                   |                   |                    |
| Germline mutation in <i>BAP1</i>     | 8.0 [3.4, 9.5]    | 7.9 [3.4, nc]     | 8.2 [1.7, 9.5]     |
| Germline mutation, any gene          | 8.0 [4.6, 14.8]   | 7.9 [3.4, nc]     | 8.2 [3.4, 14.8]    |
| No detectable germline mutation      | 2.9 [2.4, 3.5]    | 2.4 [2.0, 2.9]    | 5.4 [3.5, 9.5]     |
| Proportion surviving 5 years [95%CI] |                   |                   |                    |
| Germline mutation in <i>BAP1</i>     | 0.70 [0.37, 0.88] | 0.62 [0.15, 0.90] | 0.77 [0.35, 0.94]  |
| Germline mutation, any gene          | 0.62 [0.40, 0.77] | 0.62 [0.28, 0.84] | 0.63 [0.33, 0.82]  |
| No detectable germline mutation      | 0.32 [0.26, 0.38] | 0.23 [0.17, 0.30] | 0.52 [0.39, 0.62]  |

\*one patient with a *BAP1* mutation had both pleural and peritoneal disease  
nc, not calculable

**Table S6. Survival following platinum chemotherapy of patients with germline mutations.**

| Patient ID | Mesothelioma origin | Germline mutation | Status | Survival in days* |
|------------|---------------------|-------------------|--------|-------------------|
| MNH195     | peritoneal          | BAP1              | A      | 3467              |
| MNH107     | pleural             | BAP1              | A      | 3124              |
| MNH227     | peritoneal          | BAP1              | A      | 2731              |
| MNH248     | pleural             | BAP1              | A      | 1714              |
| UC049      | pleural+peritoneal  | BAP1              | A      | 1667              |
| MNH207     | peritoneal          | BAP1              | A      | 1464              |
| MNH159     | pleural             | BAP1              | A      | 1351              |
| MNH088     | pleural             | BAP1              | A      | 943               |
| MNH254     | peritoneal          | BAP1              | A      | 874               |
| UC041      | peritoneal          | BAP1              | A      | 788               |
| MNH182     | pleural             | BAP1              | A      | 575               |
| UC238      | peritoneal          | BAP1              | A      | 470               |
| UC221      | peritoneal          | BAP1              | A      | 467               |
| MNH240     | pleural             | BAP1              | A      | 219               |
| MNH177     | peritoneal          | BAP1              | D      | 3488              |
| MNH018     | peritoneal          | BAP1              | D      | 2992              |
| MNH104     | peritoneal          | BAP1              | D      | 2952              |
| MNH116     | pleural             | BAP1              | D      | 2909              |
| MNH029     | pleural             | BAP1              | D      | 1672              |
| MNH007     | pleural             | BAP1              | D      | 1271              |
| MNH074     | peritoneal          | BAP1              | D      | 984               |
| UC102      | peritoneal          | BAP1              | D      | 626               |
| MNH199     | peritoneal          | BAP1              | D      | 152               |
| UC170      | peritoneal          | ATM               | A      | 2147              |
| UC258      | pleural             | ATM               | D      | 496               |
| MNH086     | TV                  | BRCA2             | A      | 977               |
| UC191      | pleural             | BRCA2             | A      | 561               |
| UC241      | peritoneal          | BRCA2             | D      | 155               |
| UC061      | peritoneal          | CDKN2A            | A      | 1571              |
| UC265      | pleural             | CDKN2A            | A      | 1437              |
| MNH011     | peritoneal          | CHEK2             | A      | 4640              |
| MNH052     | pleural             | CHEK2             | A      | 1180              |
| MNH216     | peritoneal          | CHEK2             | D      | 1412              |
| MNH065     | pleural             | CHEK2             | D      | 486               |
| MNH020     | pleural             | CHEK2             | D      | 266               |
| MNH145     | peritoneal          | MLH1              | D      | 946               |
| MNH242     | pleural             | MRE11A            | A      | 244               |
| UC081      | pleural             | MSH6              | A      | 2539              |
| MNH092     | peritoneal          | PALB2             | D      | 5410              |
| MNH021     | peritoneal          | PALB2             | D      | 1687              |
| MNH153     | peritoneal          | POT1              | A      | 1149              |
| MNH041     | pleural             | TP53              | A      | 4847              |
| UC240      | pleural             | VHL               | A      | 378               |
| UC059      | peritoneal          | WT1               | D      | 1435              |

\*Days between treatment and last follow up, for patients still alive (A), or between treatment and death, for deceased patients (D).

**Table S7. Independent effects of age at diagnosis, gender, and genotype on death within 3 years of diagnosis for patients with pleural mesothelioma treated with platinum-based chemotherapy.\***

| Parameter                        | Estimate | S.E. | P     | OR [95% CI]        |
|----------------------------------|----------|------|-------|--------------------|
| Intercept                        | -2.16    | 0.73 | 0.003 |                    |
| Diagnosis $\geq$ 60 y            | 0.97     | 0.33 | 0.003 | 2.64 [1.39, 5.01]  |
| Gender male                      | 0.69     | 0.33 | 0.038 | 2.00 [1.04, 3.86]  |
| No detectable inherited mutation | 1.52     | 0.70 | 0.031 | 4.56 [1.15, 18.06] |

\*Includes 241 patients with death within 3 years or  $\geq$ 3 years follow-up; 40 patients alive  $<$ 3 years at last follow-up have undetermined 3-year survival status.

**Table S8. Genes sequenced using BROCA v10**

|                      |               |         |
|----------------------|---------------|---------|
| AKT1                 | FLCN          | POT1    |
| APC                  | GALT12        | PPMID   |
| ATM                  | GEN1          | PRKAR1A |
| ATR                  | GREM1         | PRSS1   |
| AXIN2                | HOXB13        | PTCH1   |
| BAP1                 | KIT           | PTEN    |
| BARD1                | MEN1          | RAD51B  |
| BLM                  | MET           | RAD51C  |
| BMPR1A               | MITF          | RAD51D  |
| BRCA1                | MLH1          | RB1     |
| BRCA2                | MRE11A        | RECQL   |
| BRCC3                | MSH2 (+EPCAM) | RET     |
| BRIP1                | MSH6          | RINT1   |
| CDH1                 | MUTYH         | RPS20   |
| CDK4                 | NBN           | SDHA    |
| CDKN2A               | NF1           | SDHB    |
| CHEK1                | NTHL1         | SDHC    |
| CHEK2                | PALB2         | SDHD    |
| CTNNA1               | PALLD         | SLX4    |
| ENG                  | PDGFRA        | SMAD4   |
| FAM175A<br>(ABRAXAS) | PIK3CA        | SMARCA4 |
| FANCA                | PMS2          | STK11   |
| FANCM                | POLD1         | TP53    |
| FH                   | POLE          | VHL     |
|                      |               | XRCC2   |
